# Supplementary material for: Comparison of Three Interfacial Conductive Networks Formed in Carbon Black-Filled PA6/PBT Blends
Source: MDPI journal article supplement (doi:10.3390/polym13172926), 2021-08-30
Supplement: s1 [file s1]

Supplemental files

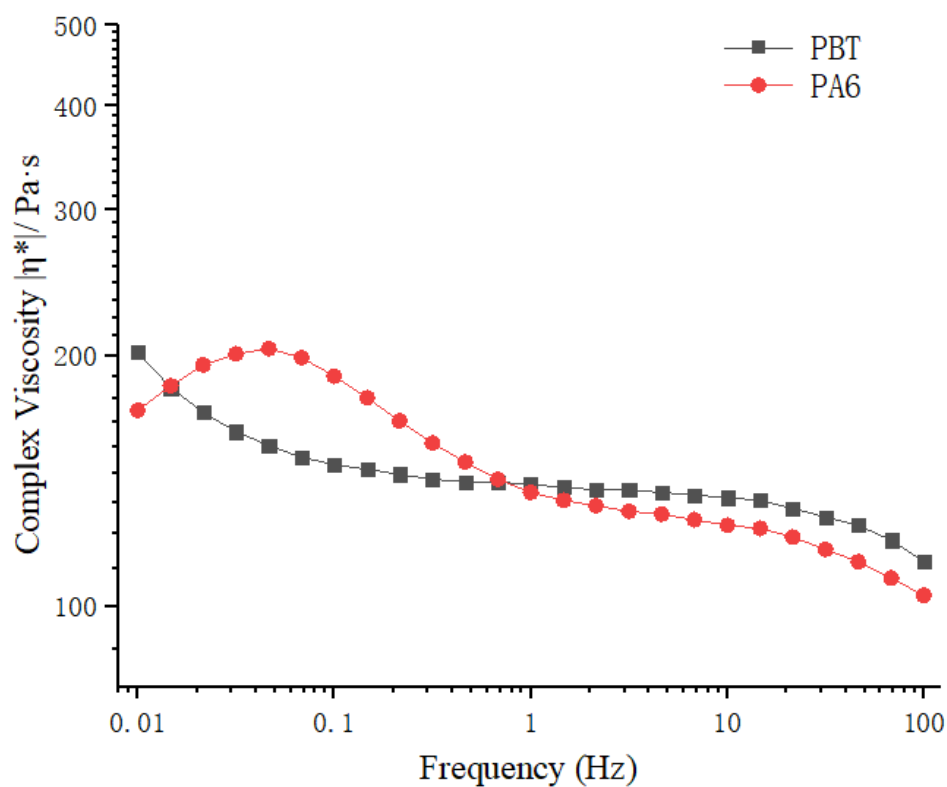

**Figure S1.** Complex viscosity of virgin PA6 and PBT resins at 250 °C as a function of frequency.

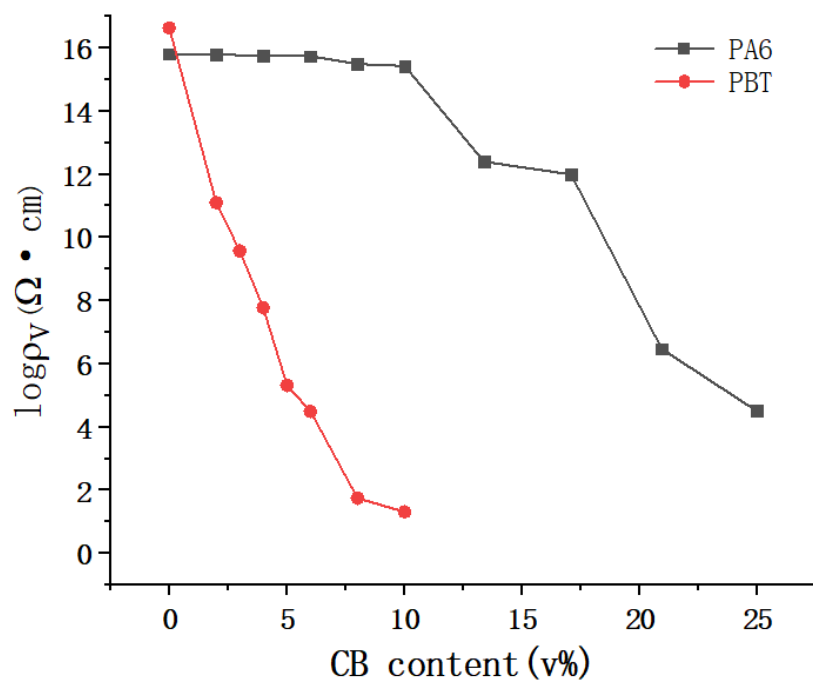

**Figure S2.** Electrical resistivity as a function of CB content for PA6/CB and PBT/CB composites.

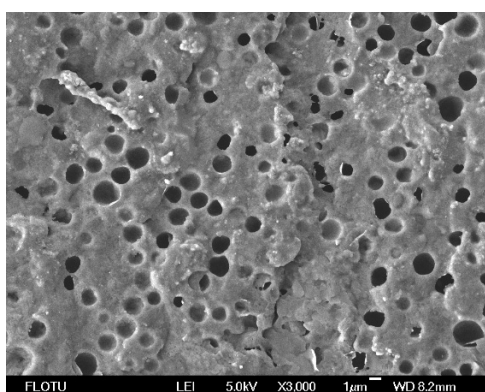

(a)

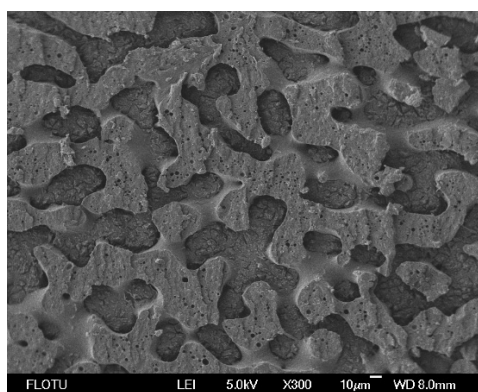

(b)

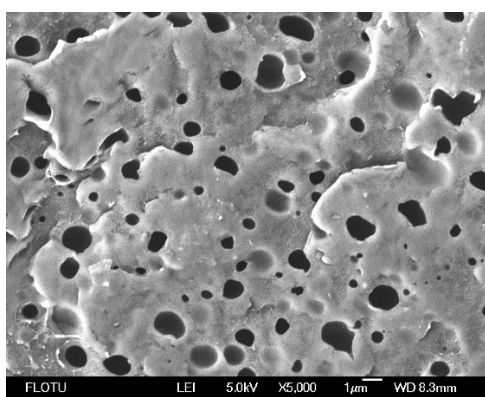

(c)

**Figure S3.** FESEM micrographs of different PA6/PBT blends: 80/20 (a), 50/50 (b) and 20/80 (c). In a and b, PBT was etched with alcoholic solution of KOH; while in c, PA6 domains were etched with formic acid.

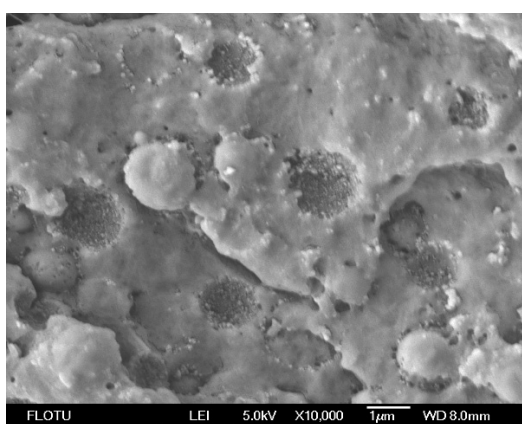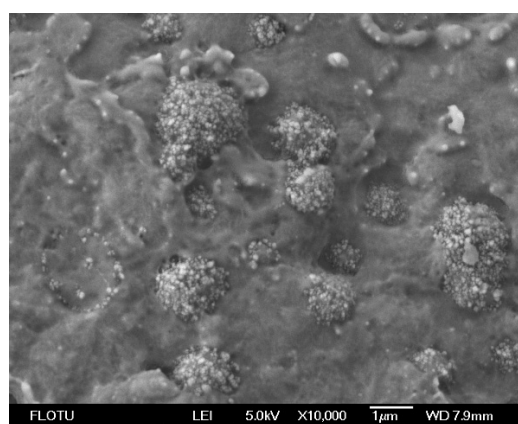

**Figure S4.** FESEM photos of PA6/PBT(80/20)-3CB (a) and PA6/PBT(20/80)-3CB (b) composites, showing selective localization of CB particles at the interface.

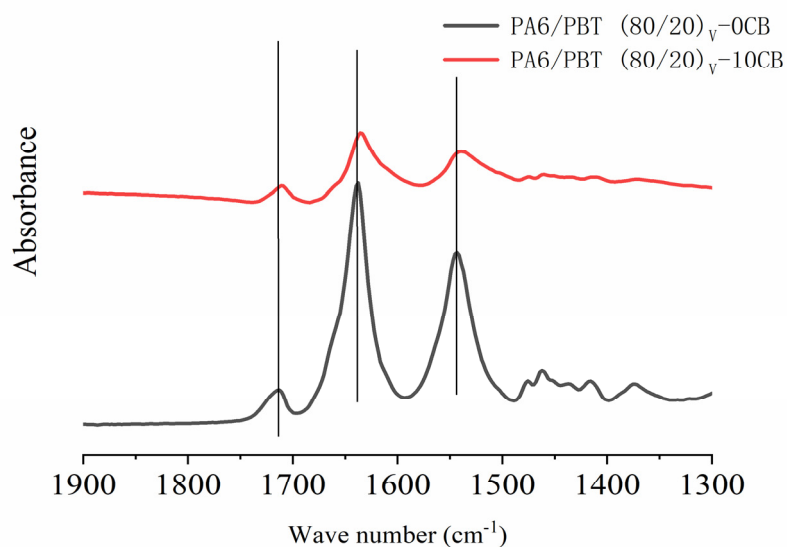

**Figure S5.** FTIR spectra of PA6/PBT(80/20)-0CB and PA6/PBT(80/20)-10CB composites. The amide I and II bands shifted from 1638.1 to 1635.1  $\text{cm}^{-1}$  and from 1543.4 to 1539.1  $\text{cm}^{-1}$ , and the carbonyl peak shifted from 1713.4 to 1710.1  $\text{cm}^{-1}$  after adding 10 vol% CB.

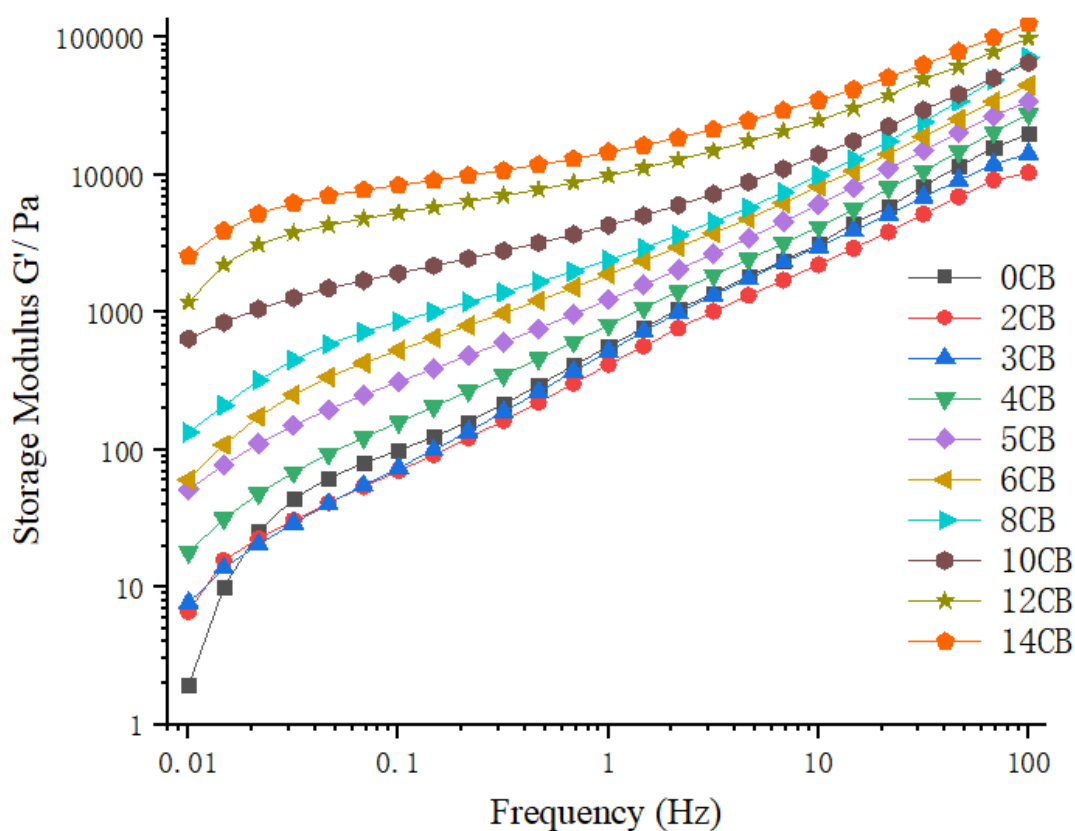

(a) PA6/PBT(80/20)-CB

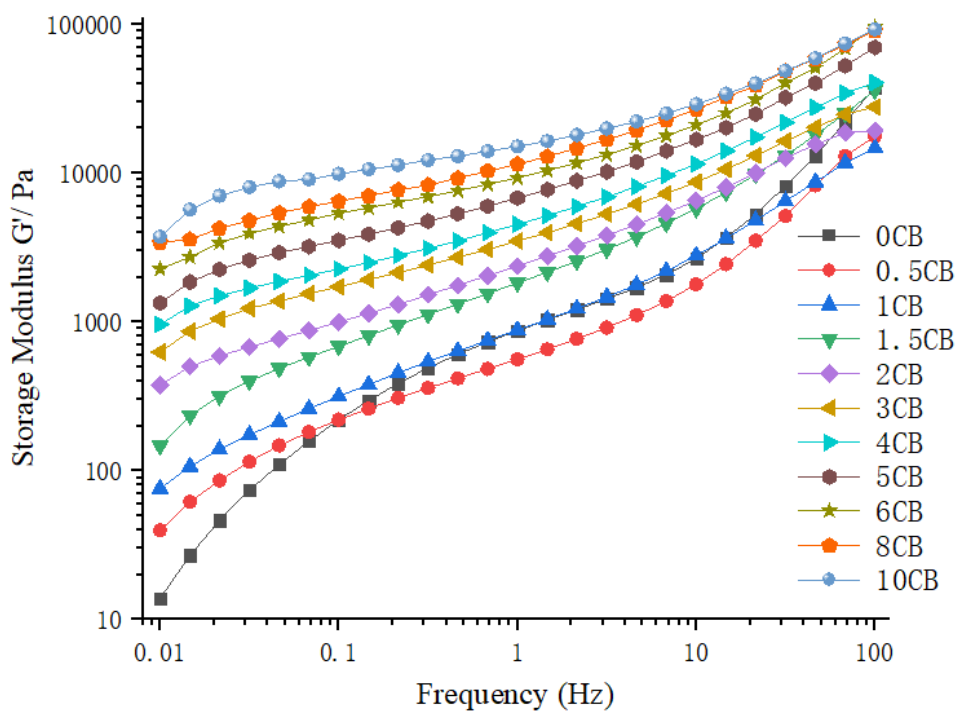

(b) PA6/PBT(50/50)-CB

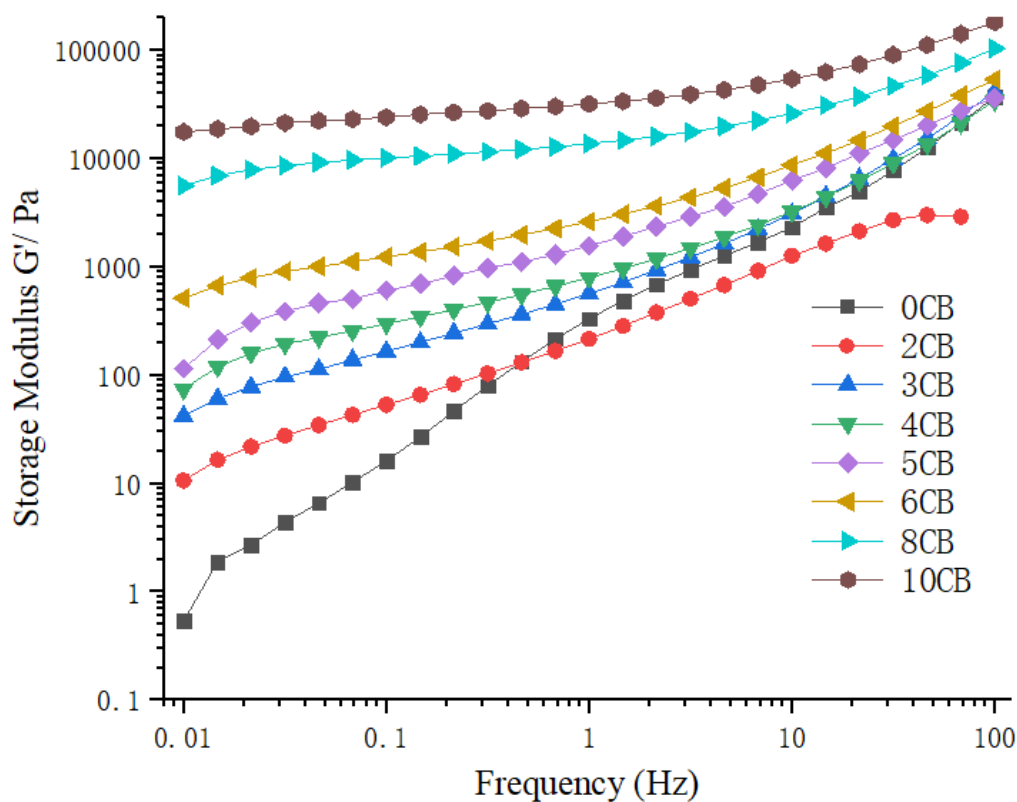

(c) PA6/PBT(20/80)-CB

**Figure S6.** Storage modulus  $G'$  as a function of frequency for PA6/PBT(80/20)-CB (a), PA6/PBT(50/50)-CB (b), and PA6/PBT(20/80)-CB (c) composites with different CB contents.

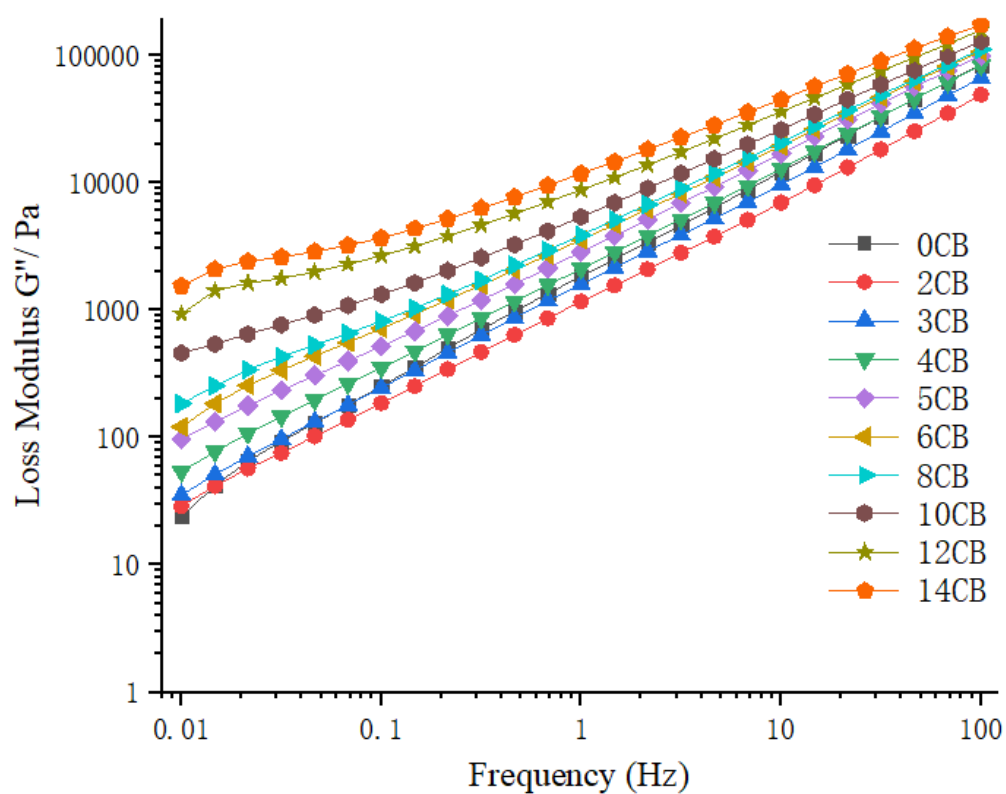

(a) PA6/PBT(80/20)-CB

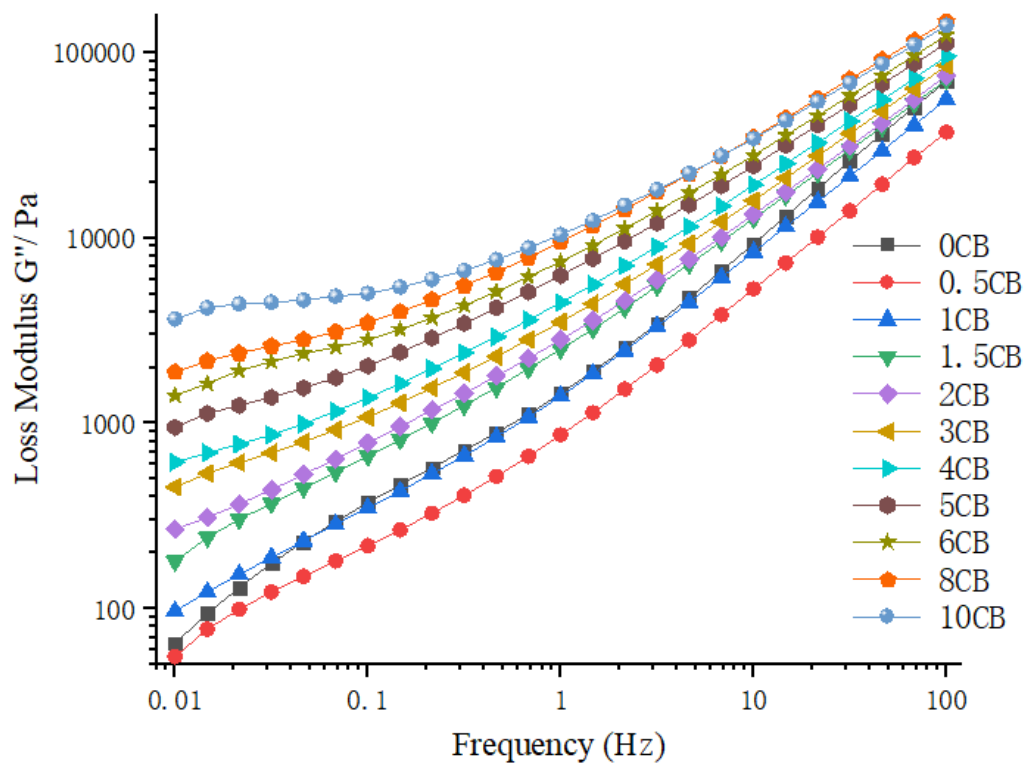

(b) PA6/PBT(50/50)-CB

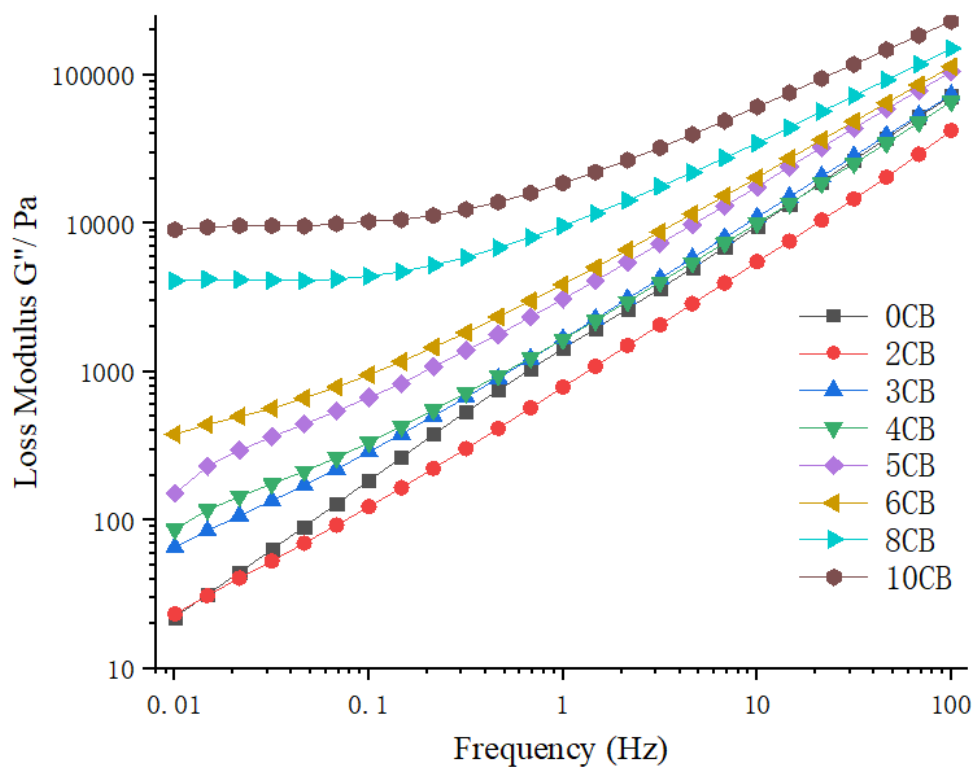

(c) PA6/PBT(20/80)-CB

**Figure S7.** Loss modulus  $G''$  as a function of frequency for PA6/PBT(80/20)-CB (a), PA6/PBT(50/50)-CB (b), and PA6/PBT(20/80)-CB (c) composites with different CB contents.

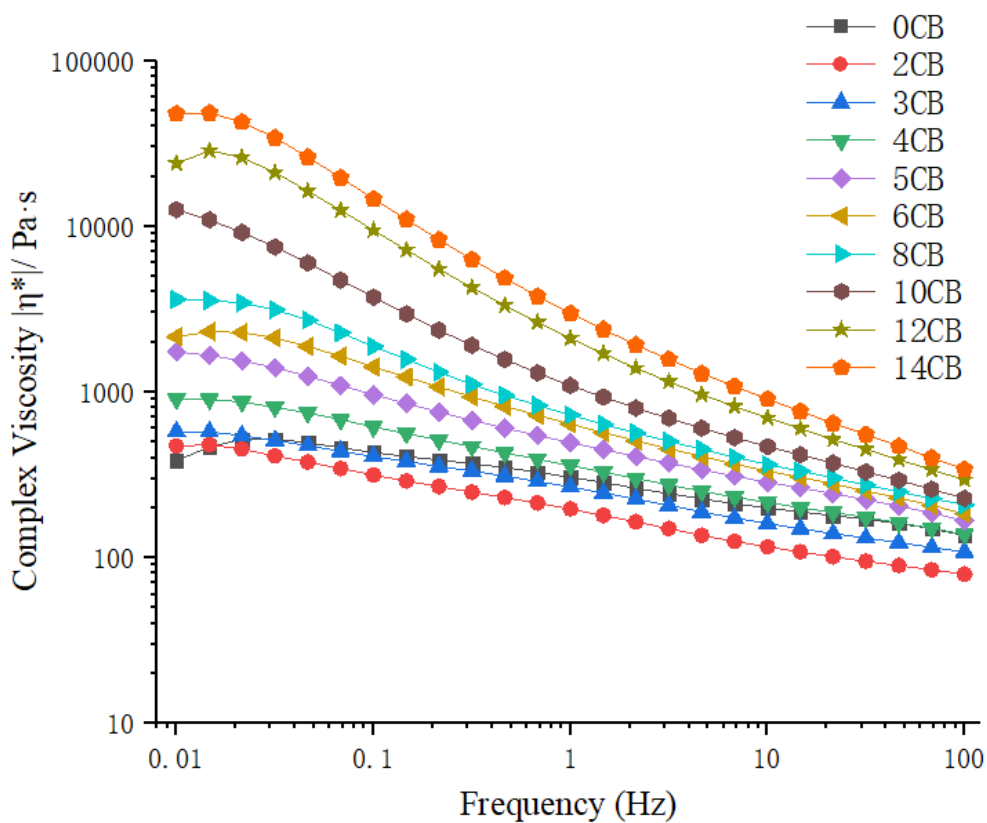

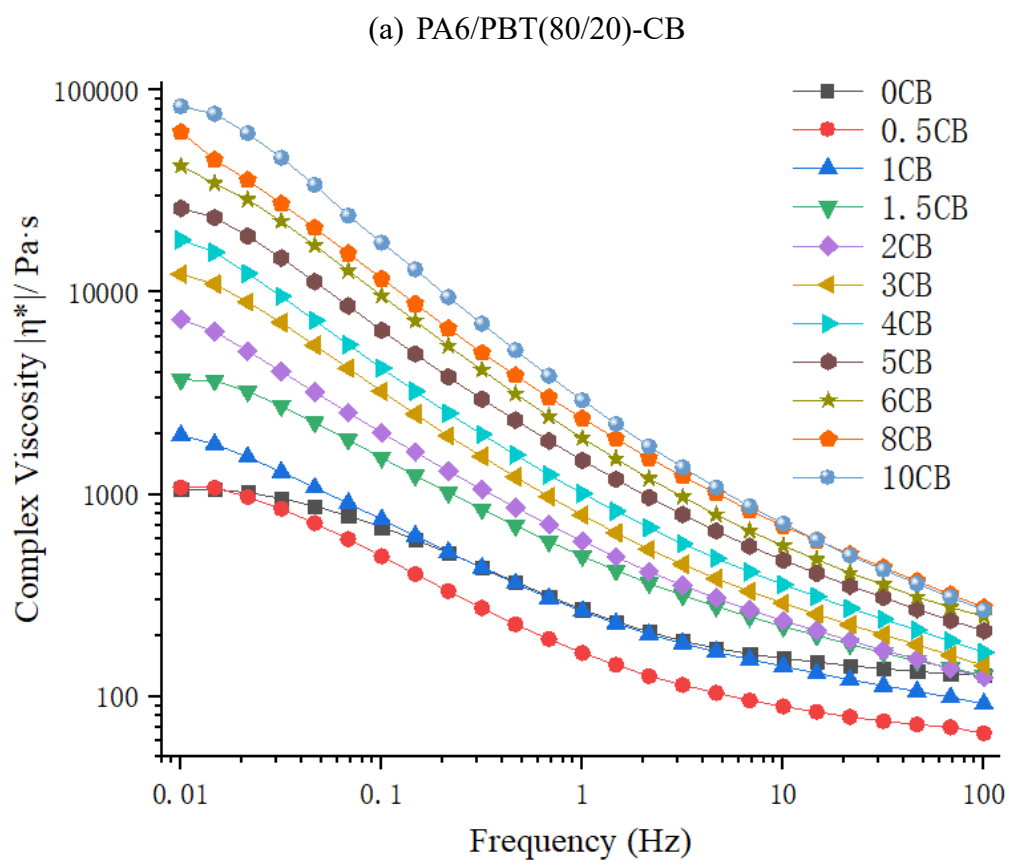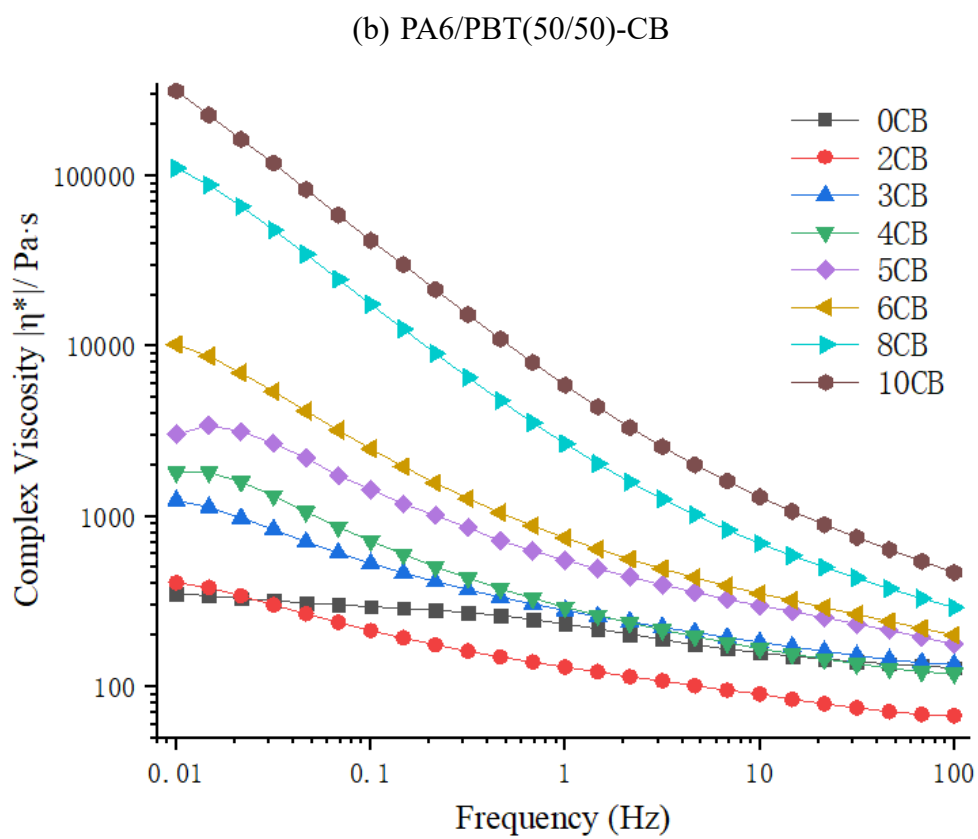

(c) PA6/PBT(20/80)-CB

**Figure S8.** Complex viscosity  $|\eta^*|$  as a function of frequency for PA6/PBT(80/20)-CB

(a), PA6/PBT(50/50)-CB (b), and PA6/PBT(20/80)-CB (c) composites with different CB contents.

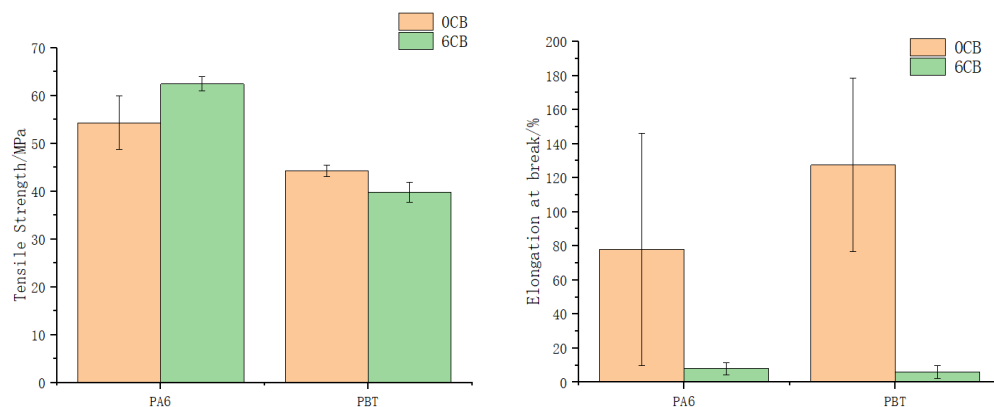

**Figure S9.** Tensile strengths (a) and elongations at break (b) of PA6 and PBT with CB contents of 0 and 6 vol%.
